# Supplementary material
Source: publisher figshare collection journal article supplement (https://tandf.figshare.com/ndownloader/files/36009639)
Supplement: Supplementary file 1 [file 36009639]

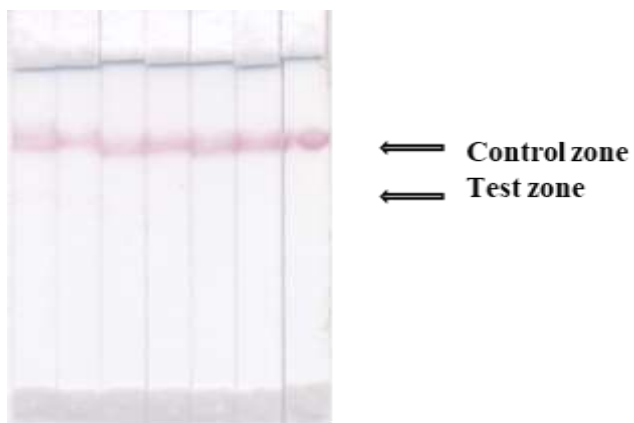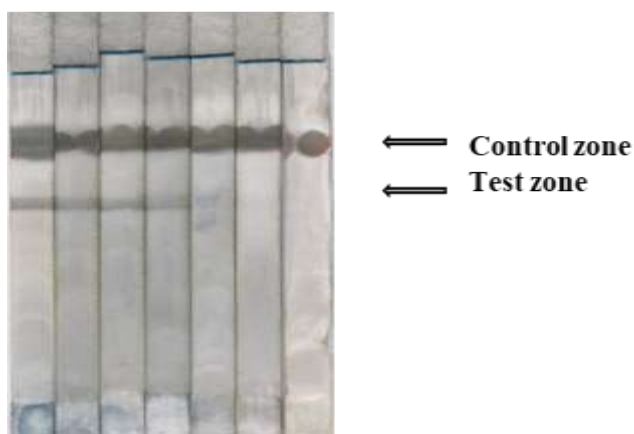

1

2 Figure S1. Comparison of test strips before and after silver enhancement. The MC-LR-  
 3 BSA conjugate (0.75 mg/mL) and RAGI (0.5 mg/mL) are immobilized in the test and  
 4 control zones, respectively. Test strips correspond to MC-LR concentrations of 0, 0.01,  
 5 0.1, 1, 10, 100, and 1000 ng/mL (from left to right).

6
